# Supplementary material
Source: PubMed Central journal article supplement (PMC4431890)
Supplement: NIHMS679889-supplement-supplement_1.pdf [file NIHMS679889-supplement-supplement_1.pdf]

SUPPLEMENTS

Supplement 1. Relationships between patient race by level of depression (PHQ-9) & willingness to undergo arthroplasty.

|                                          | Willing,<br>n | Unwilling,<br>n | OR (95% CI) <sup>a</sup> |
|------------------------------------------|---------------|-----------------|--------------------------|
| <b>Model 1</b> <sup>b, f</sup>           |               |                 |                          |
| White*Minimal-Mild Depression (Referent) | 350           | 84              |                          |
| White*Moderate-Severe Depression         | 59            | 18              | 0.79 (0.44, 1.40)        |
| AA* Minimal-Mild Depression              | 125           | 76              | 0.39 (0.27, 0.57)        |
| AA* Moderate-Severe Depression           | 51            | 30              | 0.41 (0.24, 0.68)        |
| <b>Model 2</b> <sup>c, f</sup>           |               |                 |                          |
| White*Minimal-Mild Depression (Referent) | 316           | 68              |                          |
| White*Moderate-Severe Depression         | 52            | 17              | 0.70 (0.36, 1.35)        |
| AA* Minimal-Mild Depression              | 114           | 68              | 0.39 (0.24, 0.63)        |
| AA* Moderate-Severe Depression           | 49            | 27              | 0.47 (0.24, 0.91)        |
| <b>Model 3</b> <sup>d, f</sup>           |               |                 |                          |
| White*Minimal-Mild Depression (Referent) | 316           | 68              |                          |
| White*Moderate-Severe Depression         | 52            | 17              | 0.71 (0.37, 1.38)        |
| AA* Minimal-Mild Depression              | 114           | 68              | 0.42 (0.26, 0.68)        |
| AA* Moderate-Severe Depression           | 49            | 27              | 0.47 (0.24, 0.90)        |
| <b>Model 4</b> <sup>e, f</sup>           |               |                 |                          |
| White*Minimal-Mild Depression (Referent) | 316           | 68              |                          |
| White*Moderate-Severe Depression         | 52            | 17              | 0.72 (0.37, 1.40)        |
| AA* Minimal-Mild Depression              | 114           | 68              | 0.41 (0.25, 0.66)        |
| AA* Moderate-Severe Depression           | 49            | 27              | 0.47 (0.25, 0.91)        |

<sup>a</sup> Odds Ratio (95% Confidence Interval); 95% CIs are calculated using robust variance estimates

<sup>b</sup> Model 1 = Race by PHQ-9 (Minimal-Mild [0-9] or Moderate-Severe [10-27] depression) only

<sup>c</sup> Model 2 = Model 1 + site (VA or non-VA), age, income, and WOMAC total score

<sup>d</sup> Model 3 = Model 2 + marital status + #close friends or family

<sup>e</sup> Model 4 = Model 3 + MOS Social Support

<sup>f</sup> Likelihood Ratio Test for Heterogeneity,  $p \leq 0.001$

PHQ-9=Patient Health Questionnaire-9; AA=African-American; MOS=Medical Outcomes Study; WOMAC=Western Ontario McMaster Instrument

Supplement 2. Relationships between patient race by physical health (SF-12 Physical Health) & willingness to undergo arthroplasty.

|                                       | Willing,<br>n | Unwilling,<br>n | OR (95% CI) <sup>a</sup> |
|---------------------------------------|---------------|-----------------|--------------------------|
| <b>Model 1</b> <sup>b, f</sup>        |               |                 |                          |
| White*High Physical Health (Referent) | 69            | 11              |                          |
| White*Low Physical Health             | 332           | 89              | 0.59 (0.30, 1.17)        |
| AA* High Physical Health              | 16            | 11              | 0.23 (0.09, 0.63)        |
| AA* Low Physical Health               | 156           | 90              | 0.28 (0.14, 0.55)        |
| <b>Model 2</b> <sup>c, f</sup>        |               |                 |                          |
| White*High Physical Health (Referent) | 59            | 8               |                          |
| White*Low Physical Health             | 303           | 75              | 0.61 (0.27, 1.36)        |
| AA* High Physical Health              | 15            | 10              | 0.21 (0.07, 0.66)        |
| AA* Low Physical Health               | 145           | 80              | 0.30 (0.13, 0.74)        |
| <b>Model 3</b> <sup>d, f</sup>        |               |                 |                          |
| White*High Physical Health (Referent) | 59            | 8               |                          |
| White*Low Physical Health             | 303           | 75              | 0.62 (0.28, 1.37)        |
| AA* High Physical Health              | 15            | 10              | 0.24 (0.07, 0.75)        |
| AA* Low Physical Health               | 145           | 80              | 0.32 (0.13, 0.77)        |
| <b>Model 4</b> <sup>e, f</sup>        |               |                 |                          |
| White*High Physical Health (Referent) | 59            | 8               |                          |
| White*Low Physical Health             | 303           | 75              | 0.62 (0.28, 1.38)        |
| AA* High Physical Health              | 15            | 10              | 0.23 (0.07, 0.73)        |
| AA* Low Physical Health               | 145           | 80              | 0.31 (0.13, 0.75)        |

<sup>a</sup> Odds Ratio (95% Confidence Interval); 95% CIs are calculated using robust variance estimates

<sup>b</sup> Model 1 = Race by SF-12 Physical Health (Low [ $<50$ ] or High [ $\geq 50$ ])

<sup>c</sup> Model 2 = Model 1 + site (VA or non-VA), age, income, and WOMAC total score

<sup>d</sup> Model 3 = Model 2 + marital status + #close friends or family

<sup>e</sup> Model 4 = Model 3 + MOS Social Support

<sup>f</sup> Likelihood Ratio Test for Heterogeneity,  $p \leq 0.001$

AA=African-American; MOS=Medical Outcomes Study; WOMAC=Western Ontario McMaster Instrument

Supplement 3. Comparable cohorts of patients recruited in other studies and their characteristics in comparison to our cohort

|           | Our sample          |                 |                 | OAI <sup>a</sup> Study |                 |                 | US Census (Allegheny County) <sup>b</sup> |                                   |                                   |
|-----------|---------------------|-----------------|-----------------|------------------------|-----------------|-----------------|-------------------------------------------|-----------------------------------|-----------------------------------|
|           |                     | White           | AA              |                        | White           | AA              |                                           | White                             | AA                                |
| Age       | Mean (SD)           |                 |                 | Mean (SD)              |                 |                 | Median (SE)                               |                                   |                                   |
|           |                     | 64.54<br>(9.39) | 58.68<br>(8.13) |                        | 62.27<br>(9.09) | 58.30<br>(7.96) |                                           | 43.6 (0.1)                        | 32.7 (0.4)                        |
| % Married |                     | 53.5            | 22.8            |                        | 73.32           | 39.13           |                                           | 52.2 (M) <sup>c</sup><br>46.8 (F) | 30.1 (M) <sup>c</sup><br>20.1 (F) |
| Income, % | <\$10000            | 6.9             | 31.7            | <\$10000               | 1.6             | 12.3            | <\$10000                                  | 6.0                               | 20.5                              |
|           | \$10000-<br>\$19999 | 15.6            | 31.3            | \$10000-<br>\$24999    | 9.7             | 12.9            | \$10000-<br>\$24999                       | 17.1                              | 28.5                              |
|           | \$20000-<br>\$29999 | 16.2            | 13.2            | \$25000-<br>\$49999    | 28.1            | 36.8            | \$25000-<br>\$49999                       | 25.2                              | 25.9                              |
|           | \$30000-<br>\$39999 | 10.8            | 6.4             | \$50000-<br>\$99999    | 41.1            | 25.2            | \$50000-<br>\$99999                       | 31.3                              | 19.2                              |
|           | \$40000-<br>\$49999 | 11.0            | 4.5             | ≥\$100000              | 19.5            | 12.9            | \$100000-<br>\$199999                     | 15.9                              | 5.1                               |
|           | ≥\$50000            | 39.5            | 12.8            |                        |                 |                 | ≥\$200000                                 | 4.4                               | 0.8                               |

<sup>a</sup> Osteoarthritis Initiative (OAI) Study (51). The OAI is a multicenter, longitudinal, prospective observational study of knee OA patients. We present the data only of patients recruited from the University of Pittsburgh.

<sup>b</sup> US Census Bureau, 2006-2010 American Community Survey (52).

<sup>c</sup> Marital status was presented among those ≥15 years of age, by sex (Male, Female)
